# Supplementary material for: Modulation of Increased mGluR1 Signaling by RGS8 Protects Purkinje Cells From Dendritic Reduction and Could Be a Common Mechanism in Diverse Forms of Spinocerebellar Ataxia
Source: PubMed Central journal article supplement (PMC7858651; doi:10.3389/fcell.2020.569889), 2021-01-21
Supplement: Presentation_1.pdf [file Presentation_1.pdf]

## *Supplementary Material*

### 1 Supplementary Figure 1

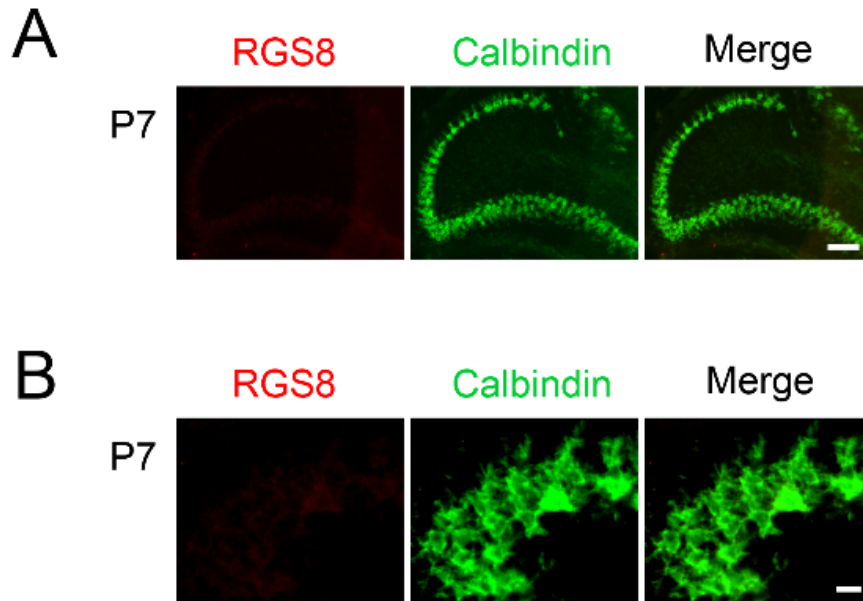

**Supplementary Figure 1.** (A) RGS8 immunoreactivity (red signal) was not obviously observed in cerebellar Purkinje cells (identified by anti-Calbindin, green) at P7. Scale bar is 100  $\mu\text{m}$ . (B) Viewed at higher magnification, RGS8 was not present or little expressed in Purkinje cells at P7. Scale bar is 20  $\mu\text{m}$ .

## 2 Supplementary Figure 2

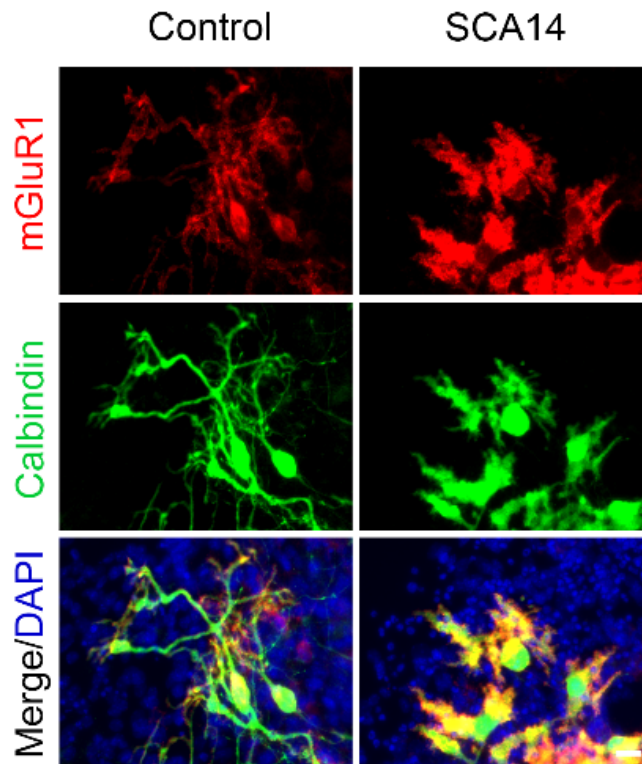

**Supplementary Figure 2.** mGluR1 immunoreactivity (red signal) was present in Purkinje cells in cerebellar slice cultures from SCA14 PKC $\gamma$ (S361G) mice and littermate controls. Purkinje cells were identified by anti-calbindin staining (green). Cell nuclei were stained with DAPI (blue). Scale bar is 20  $\mu$ m.

## 3 Supplementary Figure 3

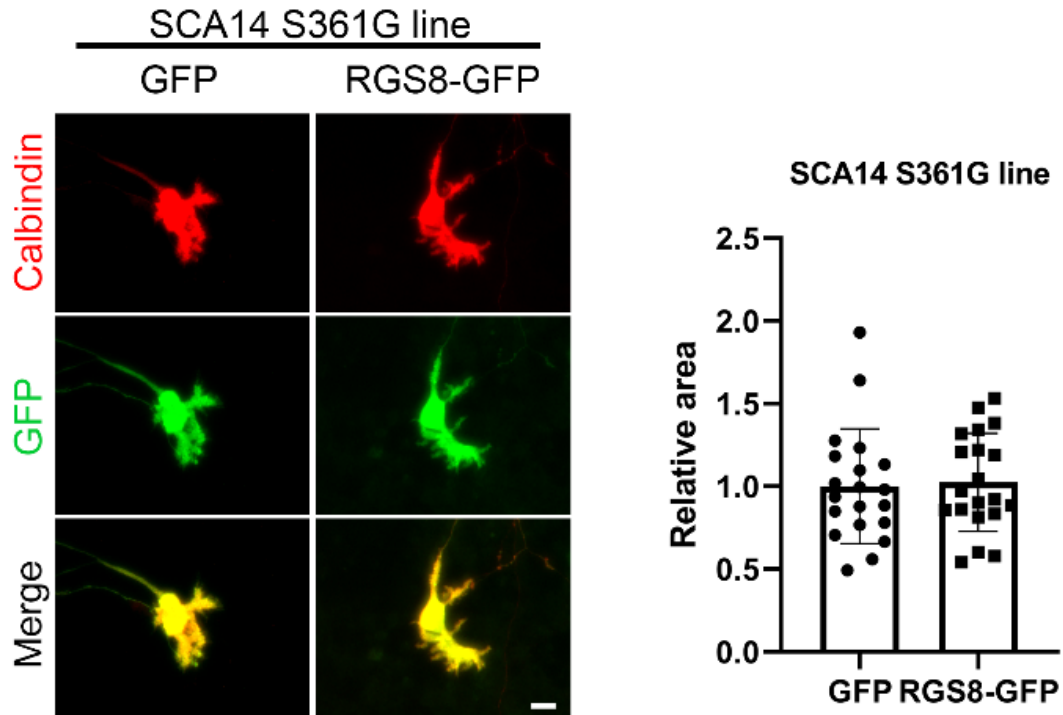

**Supplementary Figure 3.** Purkinje cell morphology of SCA14 mouse line was not significantly rescued after transfection of RGS8-GFP. Representative images of Purkinje cells after GFP or RGS8-GFP transfection. The mean values of the Purkinje cell dendritic area were measured in four independent culture wells. GFP transfection  $1.000 \pm 0.346$  vs RGS8-GFP transfection  $1.024 \pm 0.296$ ;  $n = 20$  cells,  $P = 0.6395$  in the two-tailed Mann-Whitney test. Data are expressed as mean  $\pm$  SD. Scale bar is  $20 \mu\text{m}$ .
